# Supplementary material for: High accessibility to active sites of hierarchical nanocrystalline Zr-β zeolite in ethanol–acetaldehyde conversion to 1,3-butadiene
Source: Royal Society of Chemistry journal article supplement (doi:10.1039/d3cy01053h), 2023-01-01
Supplement: d3cy01053h1.pdf [file d3cy01053h1.pdf]

**SUPPORTING INFORMATION**

**High accessibility to active sites of hierarchical nanocrystalline Zr- $\beta$  zeolite in ethanol-acetaldehyde conversion to 1,3-butadiene**

Haoxi Jiang,<sup>abc</sup> Liping Yi,<sup>abc</sup> Guochao Yang,<sup>abc</sup> and Lingtao Wang<sup>\*abc</sup>

Corresponding Address:

<sup>a</sup> Key Laboratory for Green Chemical Technology of Ministry of Education, R&D

Center for Petrochemical Technology, Tianjin University, Tianjin 300072, China

<sup>b</sup> Zhejiang Institute of Tianjin University, Ningbo, Zhejiang, 315201, China

<sup>c</sup> State Key Laboratory of Engines, Tianjin University, Tianjin 300072, China

E-mail: ltwang@tju.edu.cn

Tel: +86-22-27406119



## 32 Supplemental Data and Figures

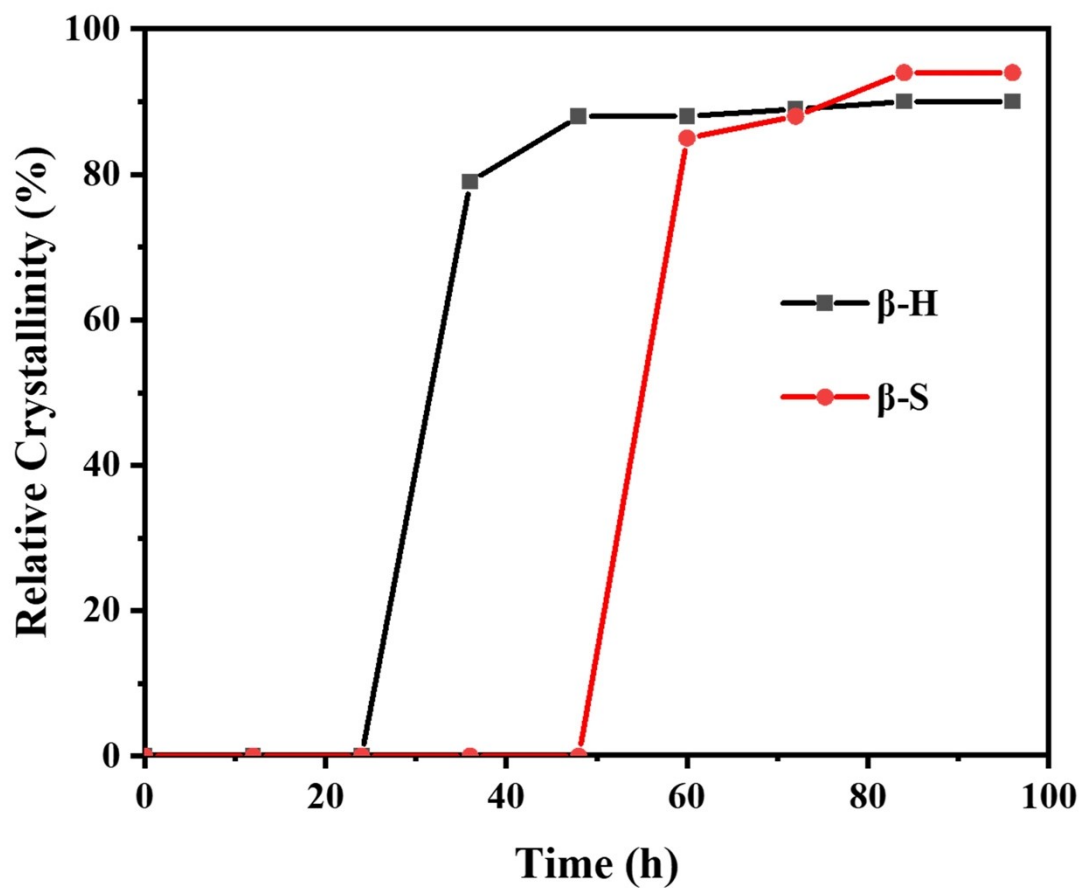

33

34 Fig. S1. The crystallization curves of  $\beta$ -S and  $\beta$ -H zeolites. Relative crystallinity is determined by  
 35 (302) plane diffraction peak in XRD.

36

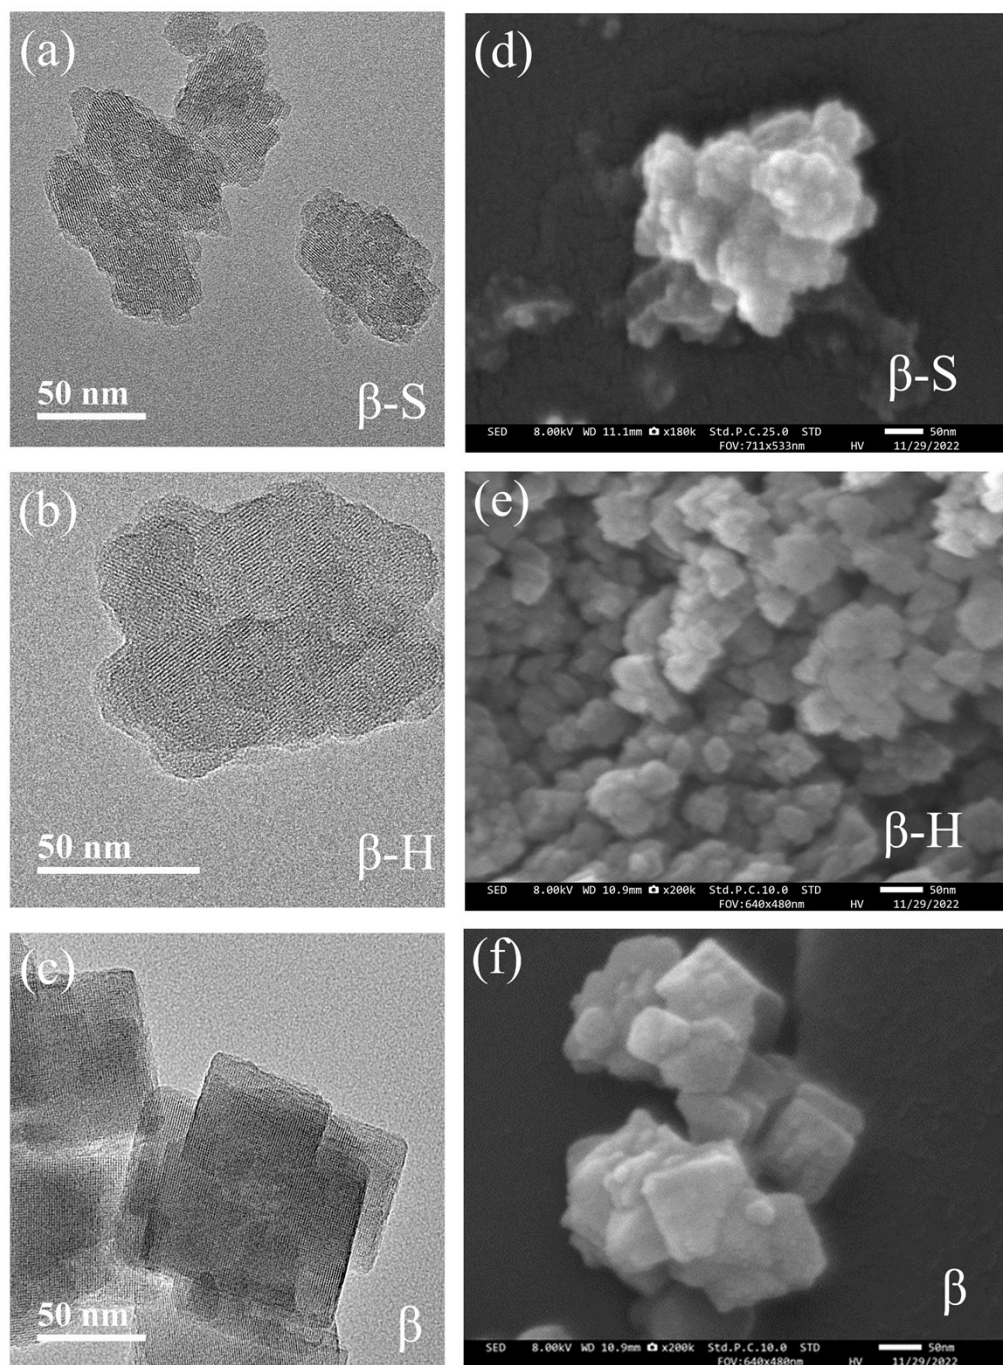

Fig. S2. TEM (a-c) and SEM (d-f) images of  $\beta$ -S,  $\beta$ -H and  $\beta$  zeolites.

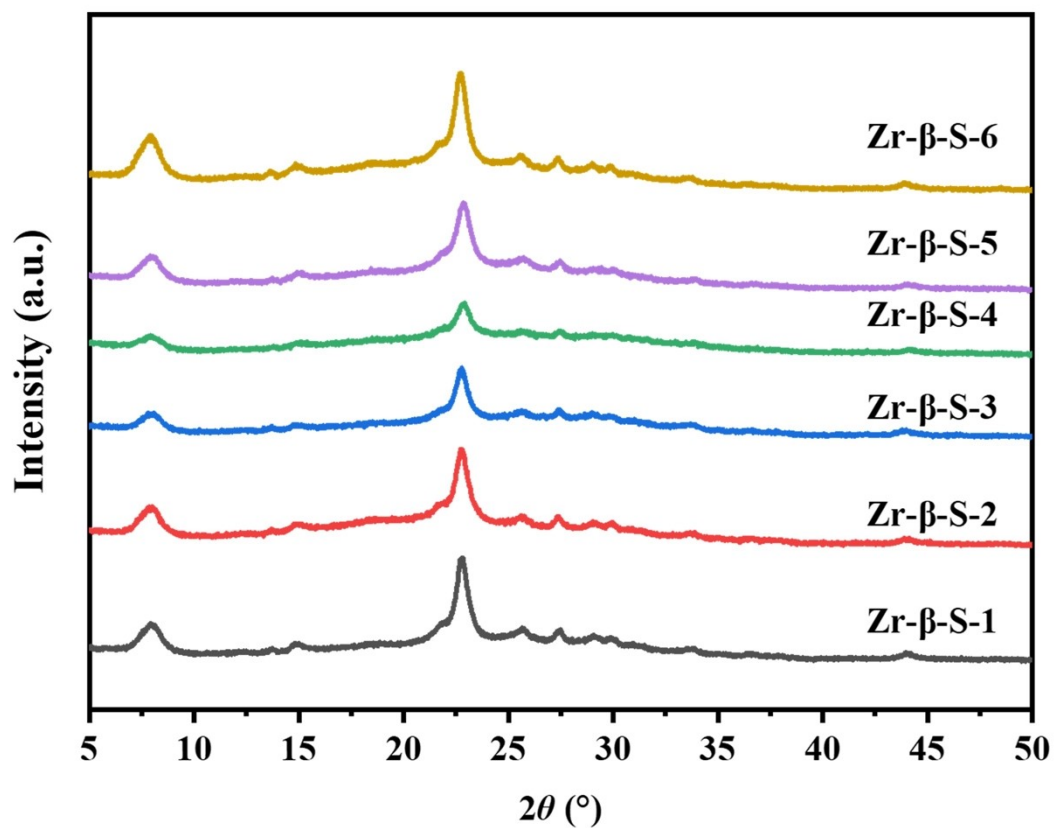

41 Fig. S3. XRD patterns of series catalysts Zr-β-S-1 to Zr-β-S-6. The diffraction peaks at  $2\theta = \sim 8.0^\circ$   
 42 and  $22.4^\circ$  represent (101) and (302) crystal planes of  $\beta$  zeolite, respectively.  
 43

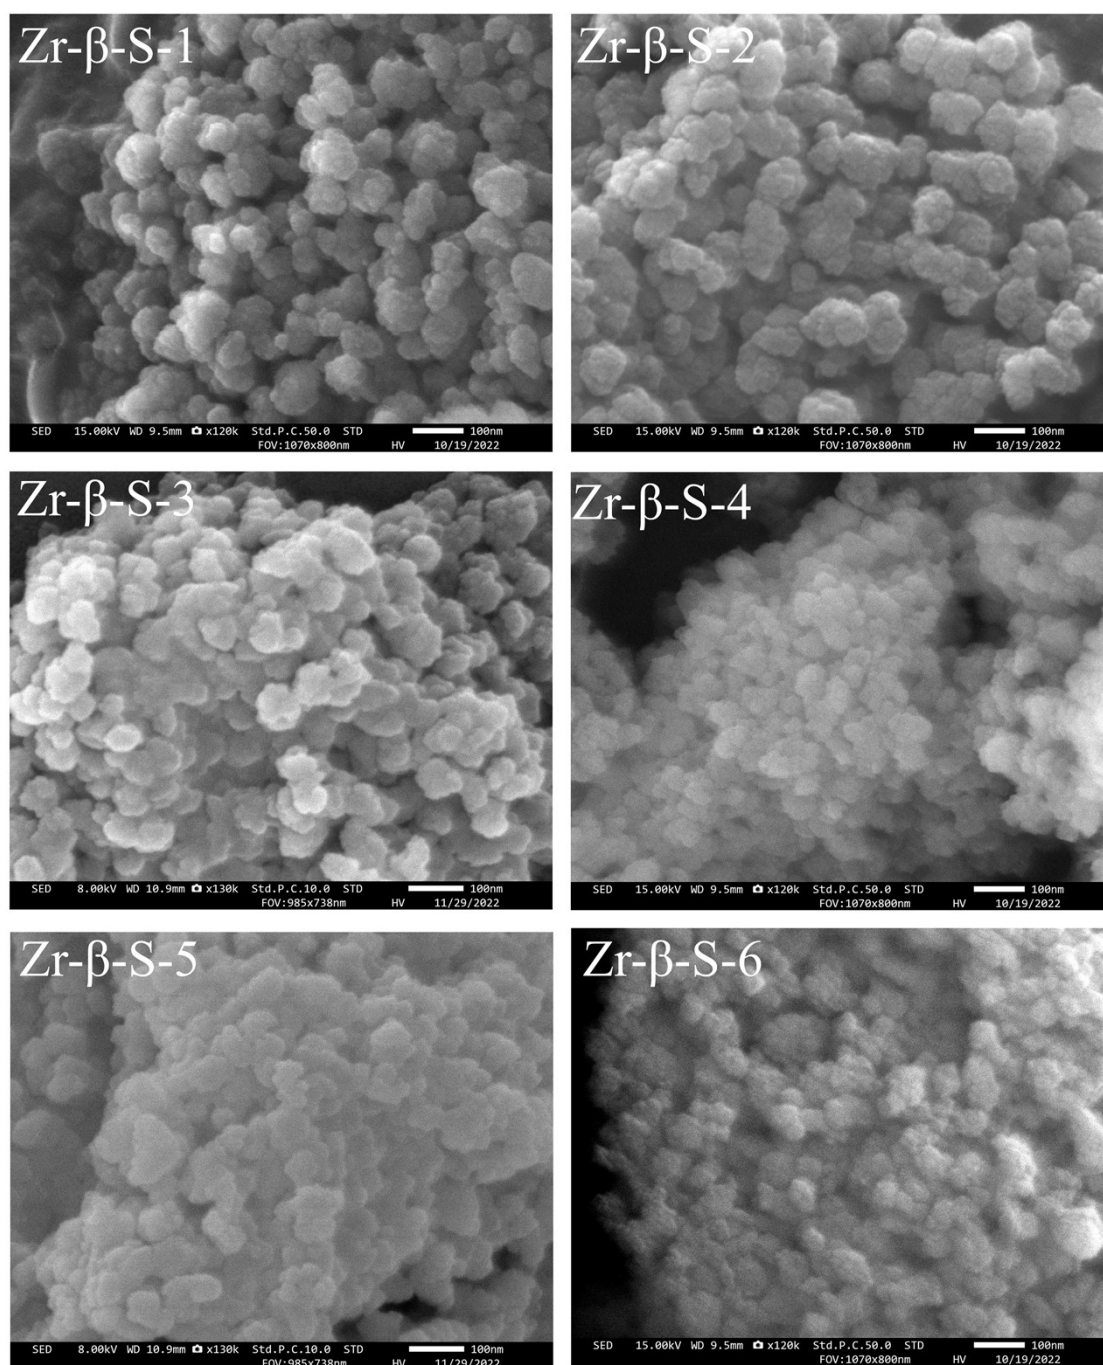

Fig. S4. SEM images of series catalysts  $\beta$ -S-1 to  $\beta$ -S-6.

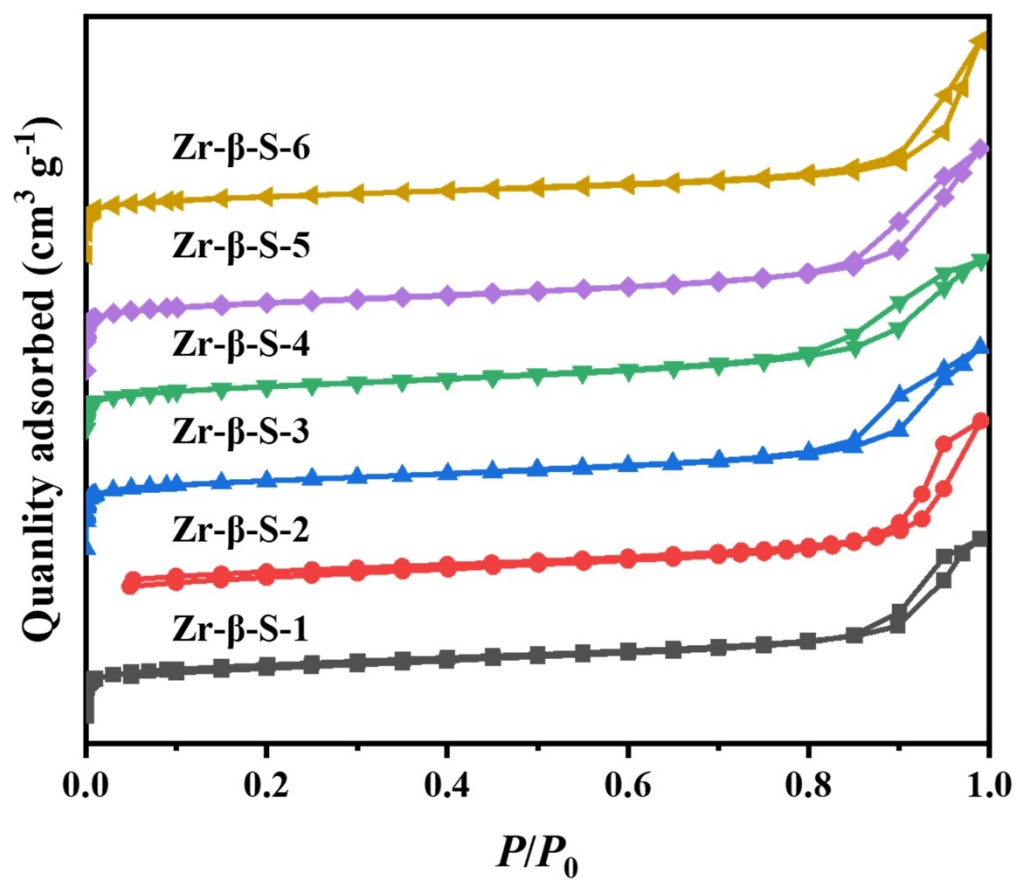

Fig. S5. N<sub>2</sub> absorption-desorption isotherms of series catalysts β-S-1 to β-S-6.

50

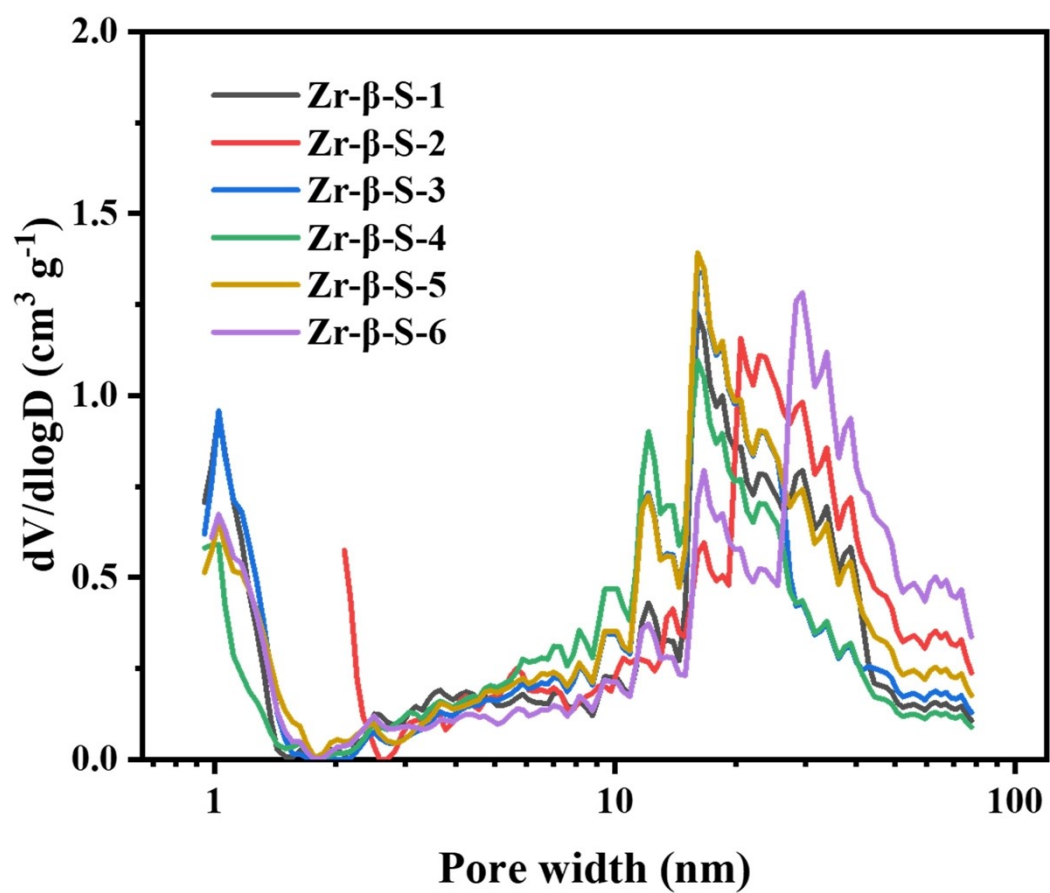

51 Fig. S6. Pore size distributions of series catalysts Zr-β-S-1 to Zr-β-S-6 according to the DFT  
 52 method on the adsorption branch.



53 Table S1. The textural properties and catalytic activities for ethanol to butadiene of series Zr-β-S catalysts.

| Porosity    | Sample   | $S_{\text{BET}}^{\text{a}}$<br>( $\text{m}^2 \text{g}^{-1}$ ) | $V_{\text{Total}}^{\text{b}}$<br>( $\text{cm}^3 \text{g}^{-1}$ ) | $V_{\text{Micro}}^{\text{c}}$<br>( $\text{cm}^3 \text{g}^{-1}$ ) | $V_{\text{Meso}}^{\text{d}}$<br>( $\text{cm}^3 \text{g}^{-1}$ ) | $V_{\text{Micro}}/V_{\text{Total}}$ | Con. <sup>e</sup><br>(%) | Sel. <sup>e</sup> (%) |          |       |           |        |                  |                     |        |
|-------------|----------|---------------------------------------------------------------|------------------------------------------------------------------|------------------------------------------------------------------|-----------------------------------------------------------------|-------------------------------------|--------------------------|-----------------------|----------|-------|-----------|--------|------------------|---------------------|--------|
|             |          |                                                               |                                                                  |                                                                  |                                                                 |                                     |                          | Butadiene             | Ethylene | Ether | Propylene | Butene | Ethyl<br>acetate | Croton-<br>aldehyde | Others |
| Micropores  | Zr-β     | 643                                                           | 0.729                                                            | 0.196                                                            | 0.533                                                           | 0.306                               | 26.1                     | 62.8                  | 2.4      | 1.3   | 1.3       | 1.4    | 4.9              | 12.3                | 13.7   |
|             | Zr-β-S-1 | 654                                                           | 0.753                                                            | 0.211                                                            | 0.542                                                           | 0.280                               | 48.6                     | 65.1                  | 1.5      | 0.7   | 1.8       | 2.0    | 4.6              | 9.8                 | 14.6   |
|             | Zr-β-S-2 | 593                                                           | 0.867                                                            | 0.221                                                            | 0.646                                                           | 0.255                               | 49.6                     | 66.3                  | 1.8      | 1.2   | 1.8       | 2.7    | 3.4              | 6.4                 | 16.3   |
|             | Zr-β-S-3 | 631                                                           | 0.771                                                            | 0.190                                                            | 0.581                                                           | 0.246                               | 53.0                     | 69.3                  | 2.0      | 1.1   | 2.0       | 2.2    | 5.6              | 6.6                 | 11.2   |
| Hierarchies | Zr-β-S-4 | 586                                                           | 0.730                                                            | 0.168                                                            | 0.562                                                           | 0.230                               | 48.1                     | 70.3                  | 2.2      | 1.0   | 2.2       | 1.7    | 4.5              | 7.3                 | 10.8   |
|             | Zr-β-S   | 712                                                           | 0.979                                                            | 0.216                                                            | 0.763                                                           | 0.221                               | 55.1                     | 73.5                  | 2.1      | 1.3   | 2.2       | 2.2    | 3.0              | 5.5                 | 10.2   |
|             | Zr-β-S-5 | 621                                                           | 0.848                                                            | 0.182                                                            | 0.666                                                           | 0.215                               | 46.3                     | 69.5                  | 3.1      | 1.9   | 2.1       | 2.6    | 5.4              | 5.1                 | 10.3   |
|             | Zr-β-S-6 | 537                                                           | 0.819                                                            | 0.171                                                            | 0.648                                                           | 0.209                               | 50.6                     | 67.2                  | 2.4      | 1.0   | 1.9       | 2.4    | 4.5              | 7.4                 | 13.2   |

54 <sup>a</sup> Specific BET surface areas obtained from N<sub>2</sub> adsorption branch.

55 <sup>b</sup> Total pore volume calculated from the N<sub>2</sub> quality adsorbed at  $P/P_0 = 0.97$ .

56 <sup>c</sup> Micropore volume calculated by t-plot method.

57 <sup>d</sup> Mesopore volume calculated from the difference between  $V_{\text{Total}}$  and  $V_{\text{Micro}}$ .

58 <sup>e</sup> Reaction conditions: 598 K, WHSV = 1.04 h<sup>-1</sup>, TOS = 6 h.

59
